# Supplementary material for: The Spatial Analysis of Vegetation Cover and Permafrost Degradation for a Subarctic Palsa Mire Based on UAS Photogrammetry and GPR Data in the Kola Peninsula
Source: MDPI journal article supplement (doi:10.3390/rs15071896), 2023-03-31

Figure S3: Land cover classification of the Lovozero palsa mire into six cover classes : W – water, LH - lichen hummock vegetation, C - carpet vegetation, TG - tall graminoid vegetation, MH - moist hummock vegetation, TSh - tall shrub vegetation

(a) normal bayes algorithm

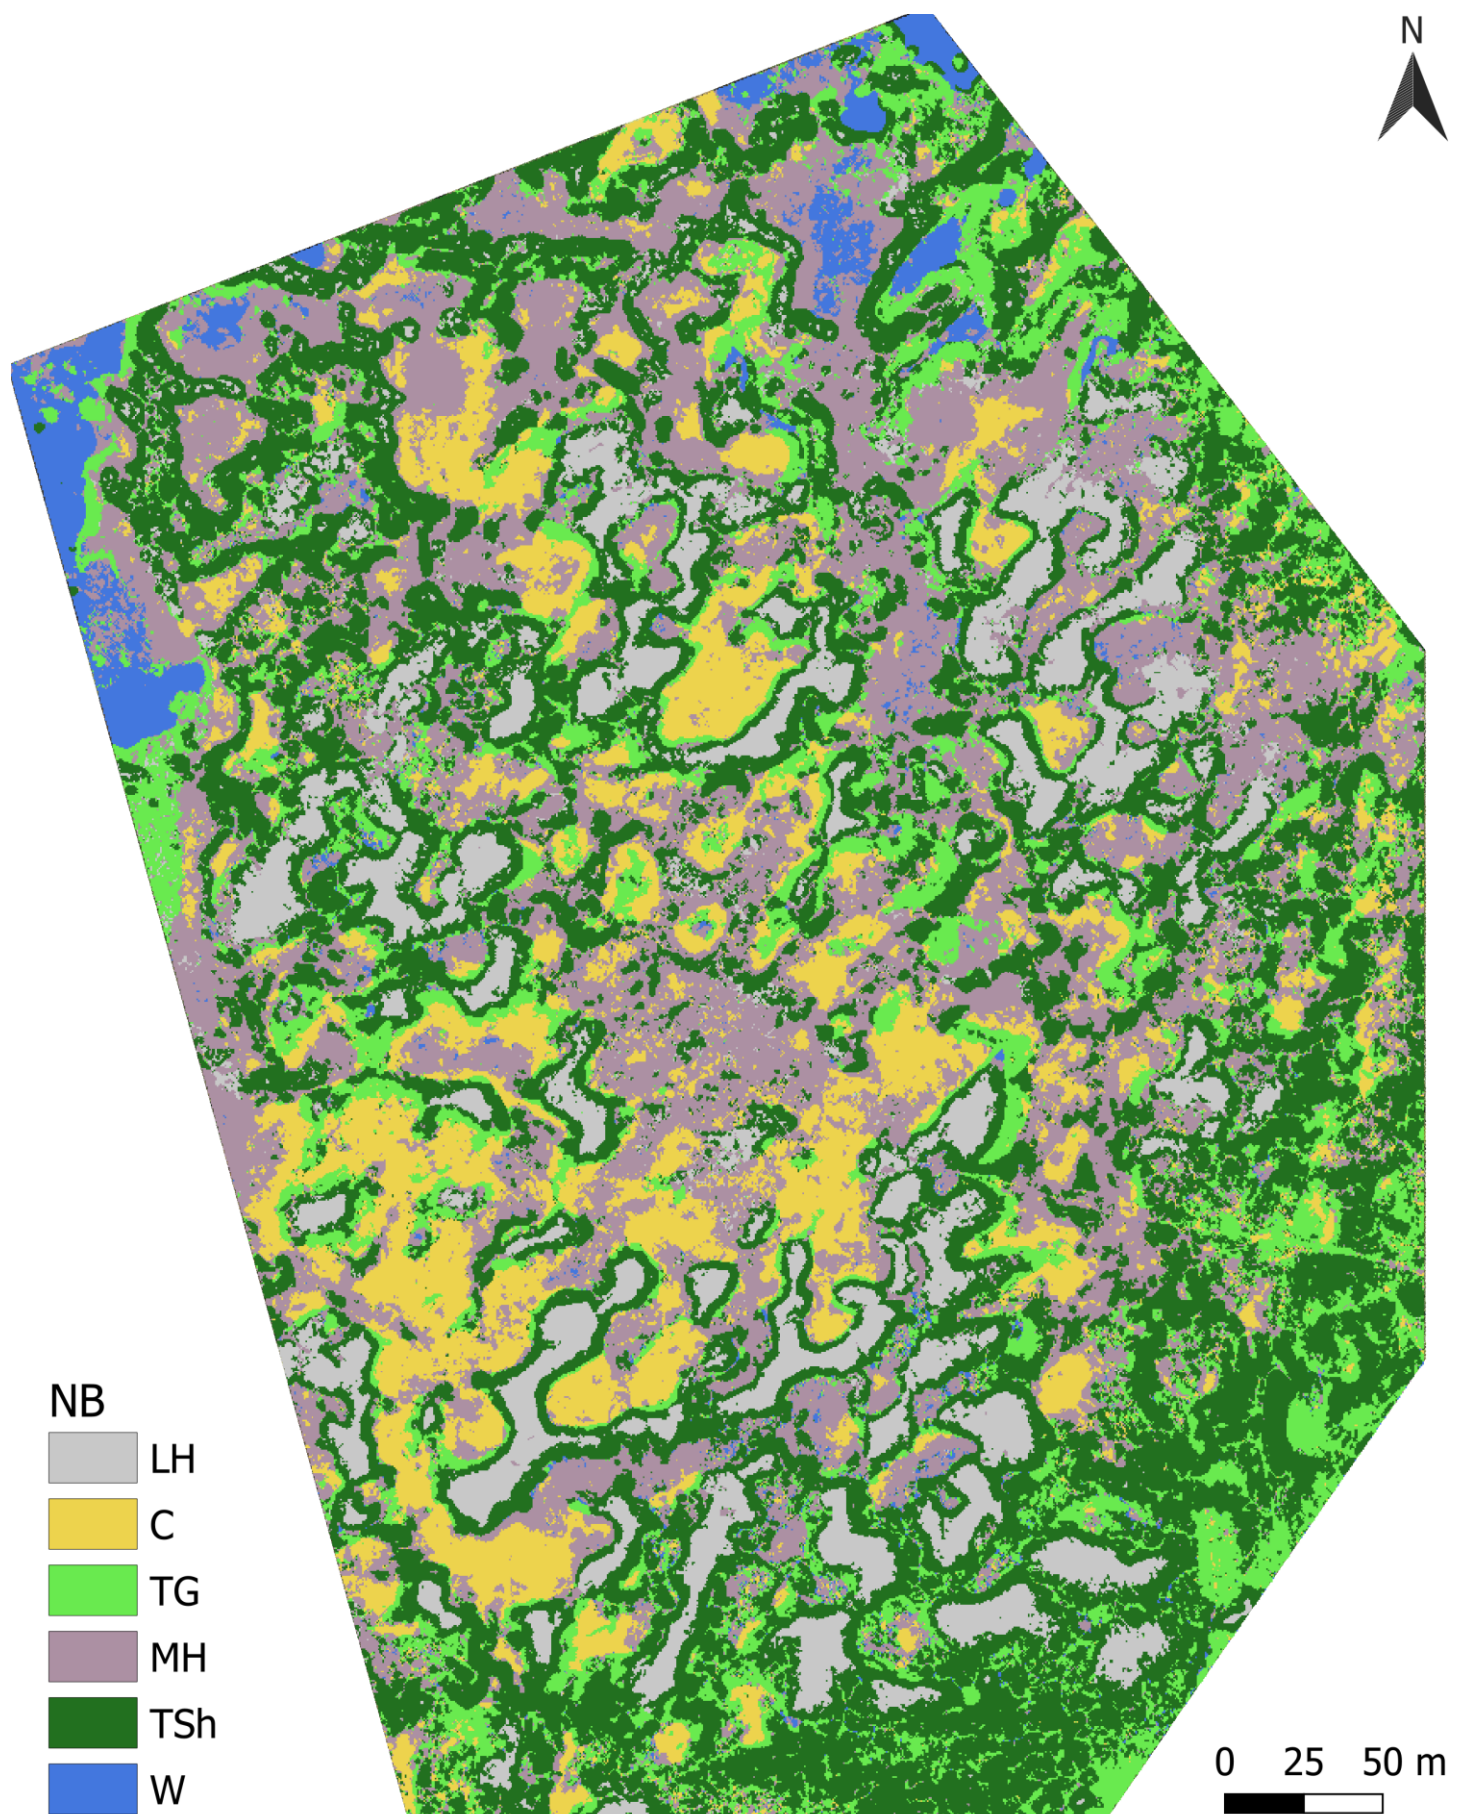



(b) random forest

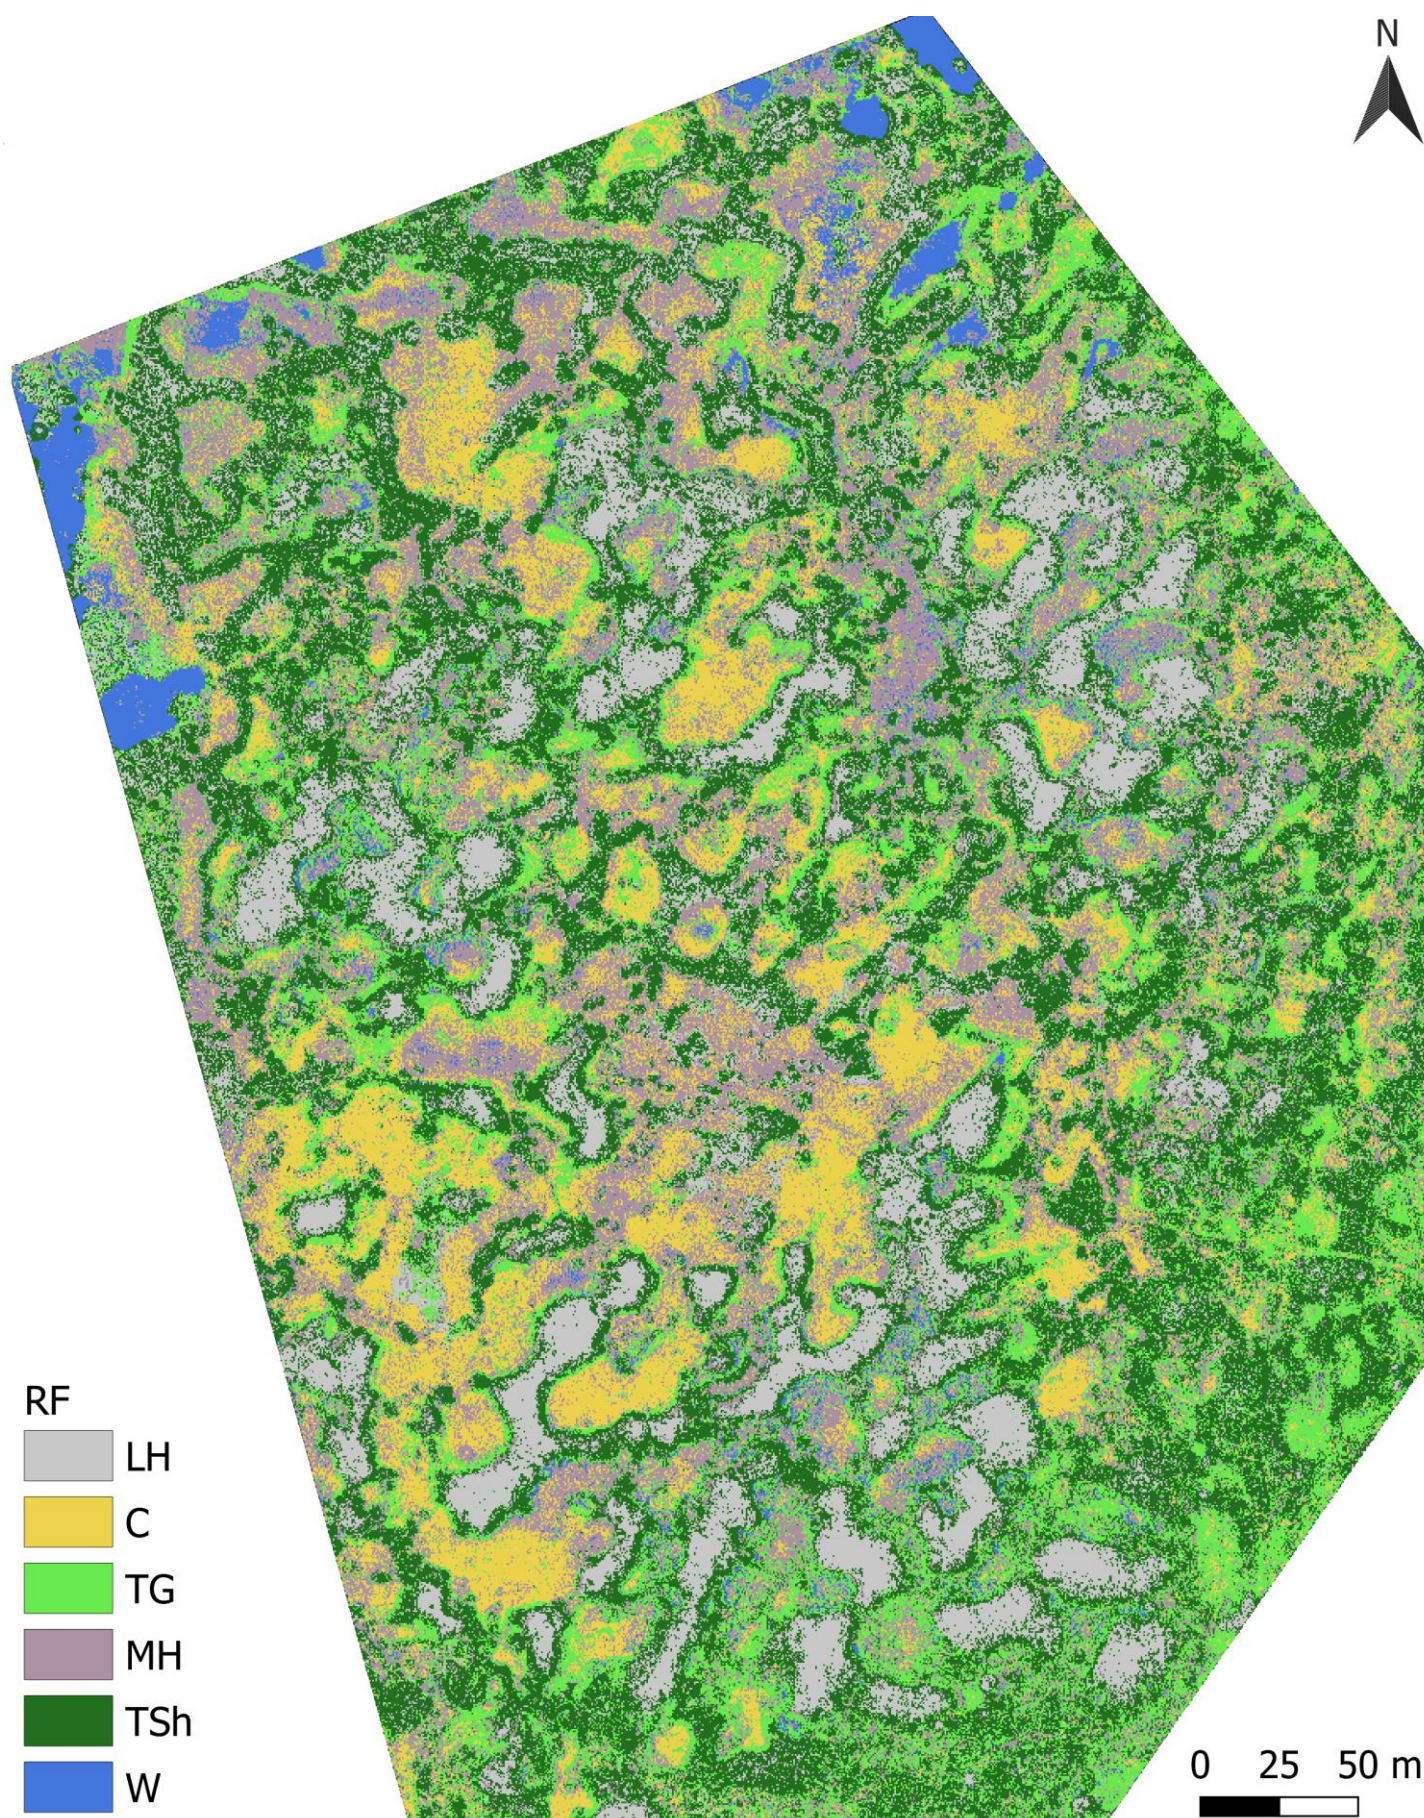



(c) support vector machines

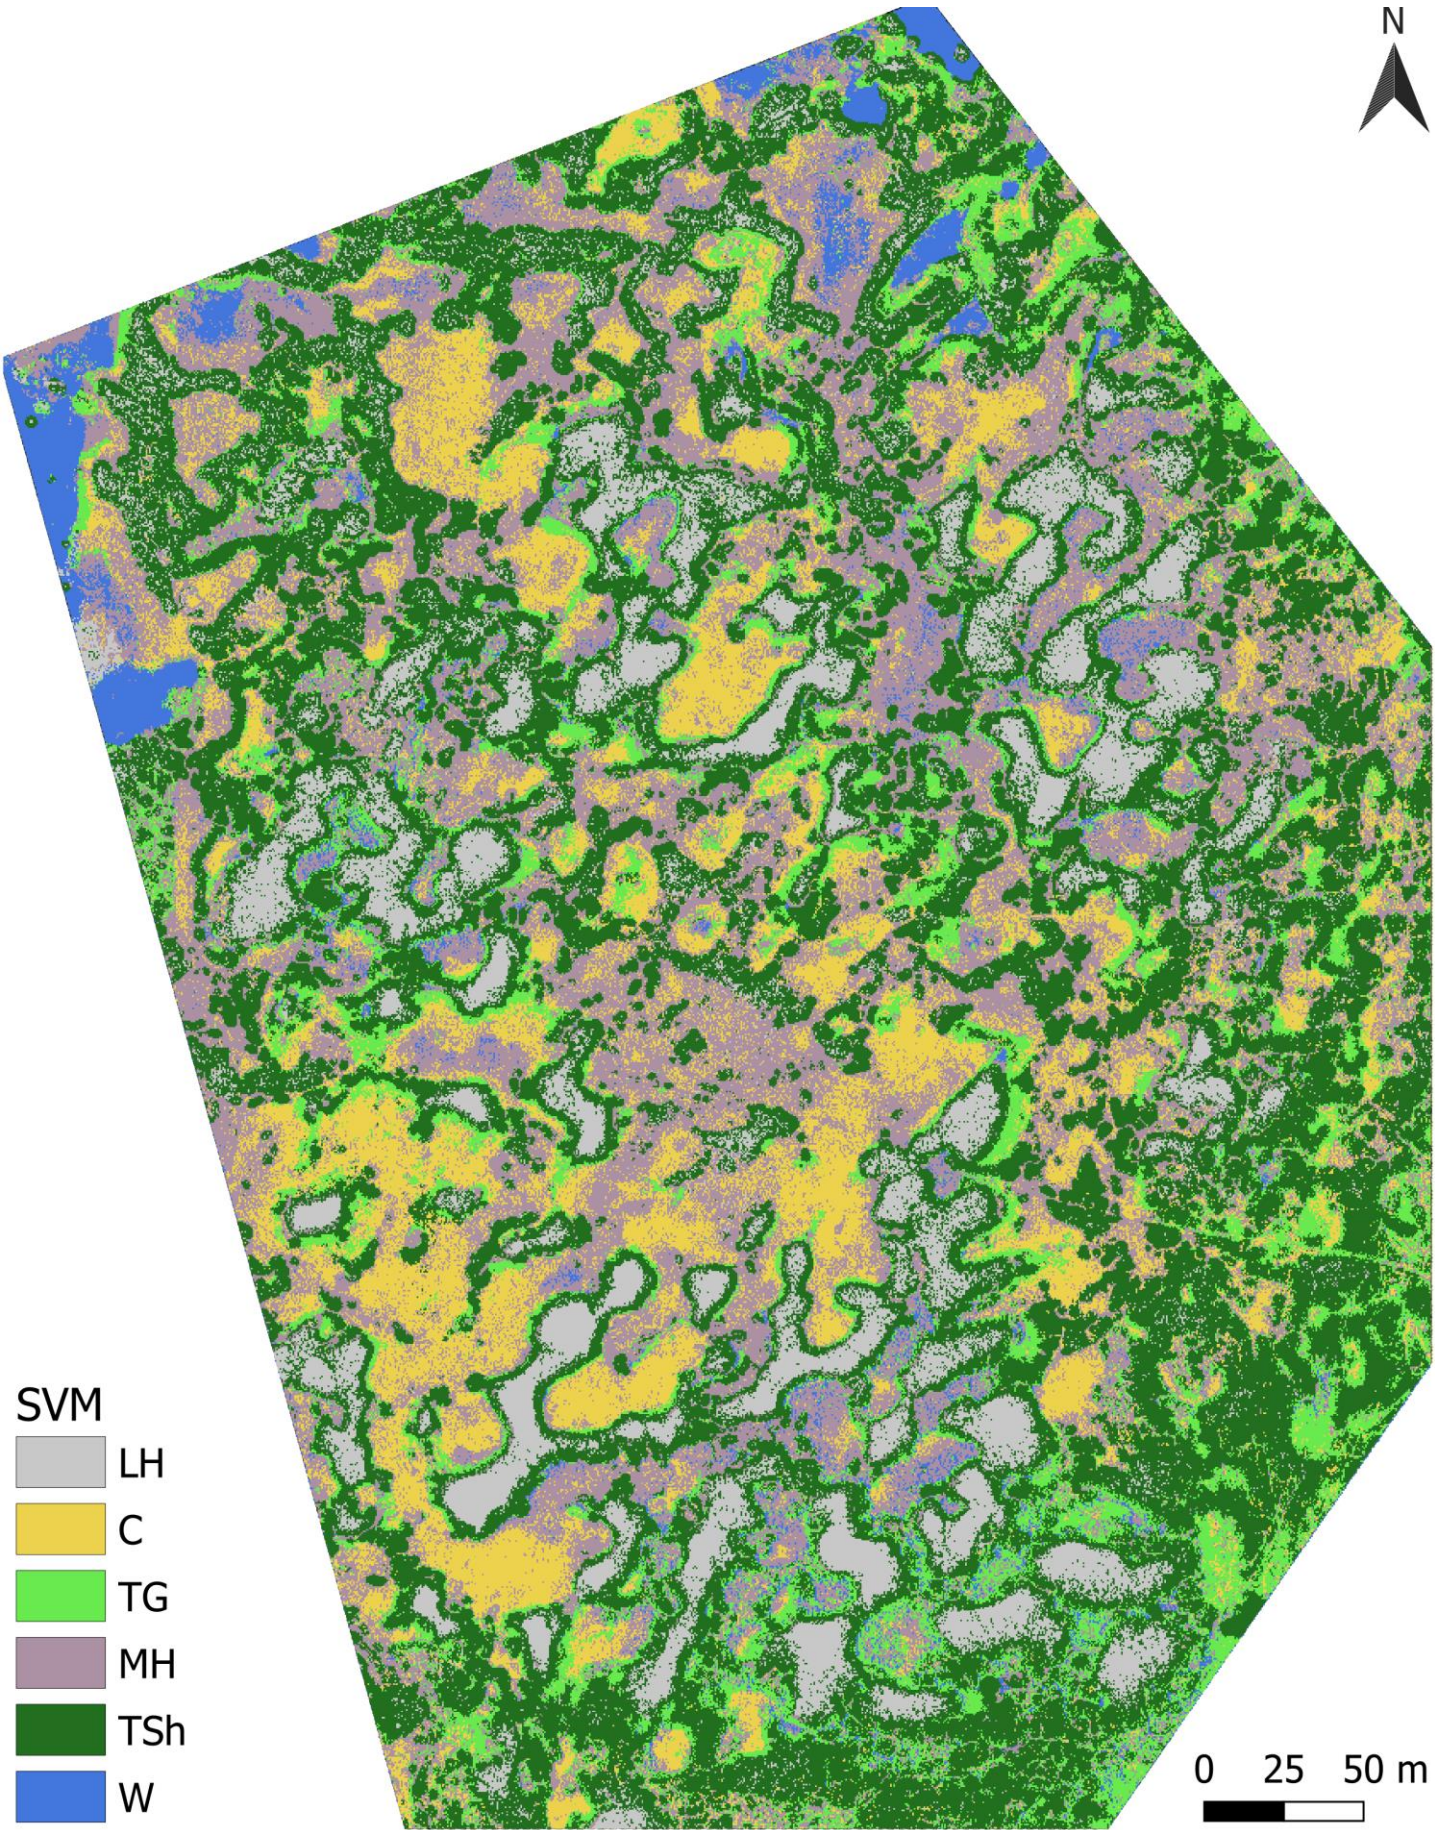

Supplement: s1 [file s1]
