# Supplementary material for: The Spatial Analysis of Vegetation Cover and Permafrost Degradation for a Subarctic Palsa Mire Based on UAS Photogrammetry and GPR Data in the Kola Peninsula
Source: MDPI journal article supplement (doi:10.3390/rs15071896), 2023-03-31

1. Survey data: Camera locations and image overlap.

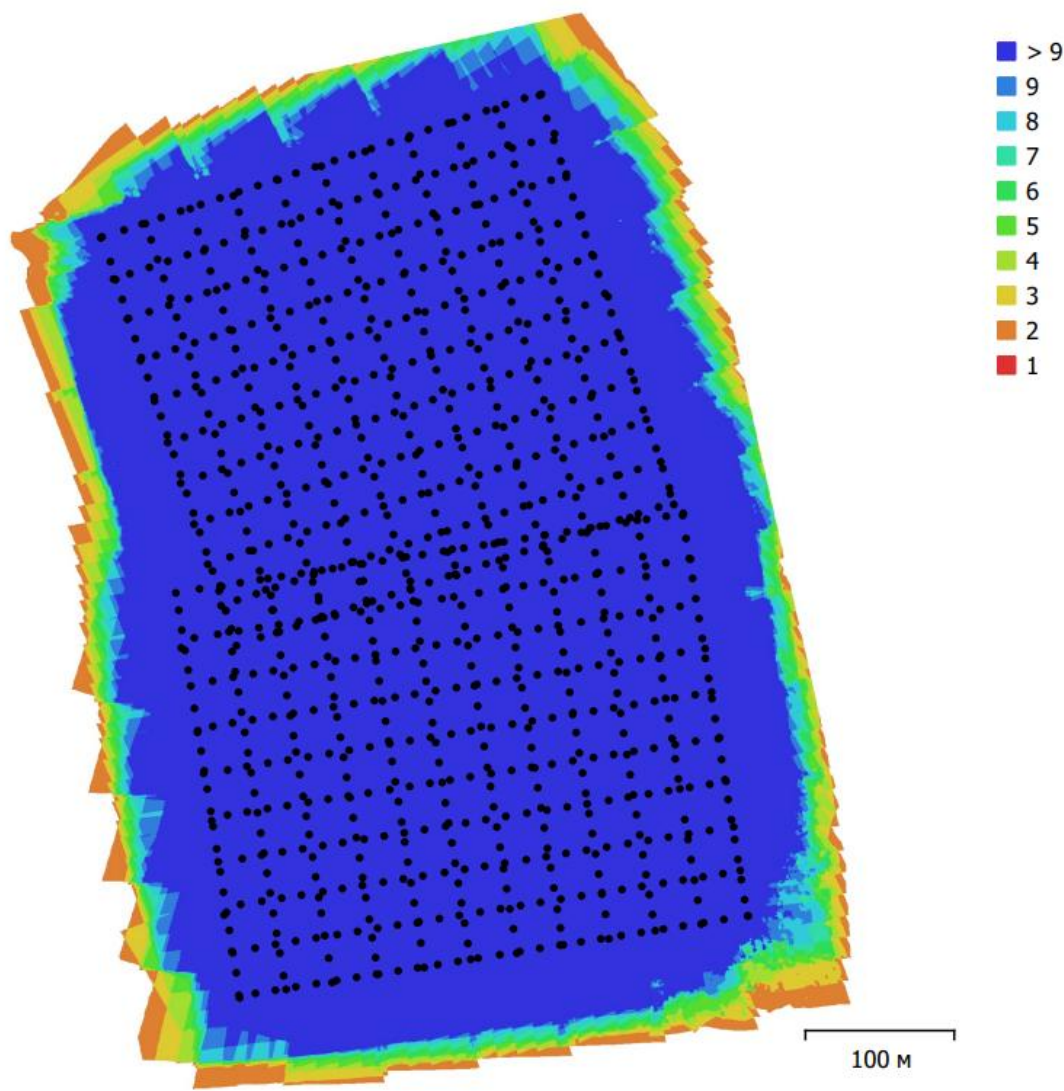

|                     |                       |
|---------------------|-----------------------|
| Number of images:   | 1,014                 |
| Flying altitude:    | 79,2 m                |
| Ground resolution:  | 1.96 cm/pix           |
| Coverage area:      | 0.306 km <sup>2</sup> |
| Tie points:         | 467,461               |
| Projections:        | 3,740,688             |
| Reprojection error: | 0.533 pix             |

2. Camera Calibration: Image residuals for FC6310S (8.8mm).

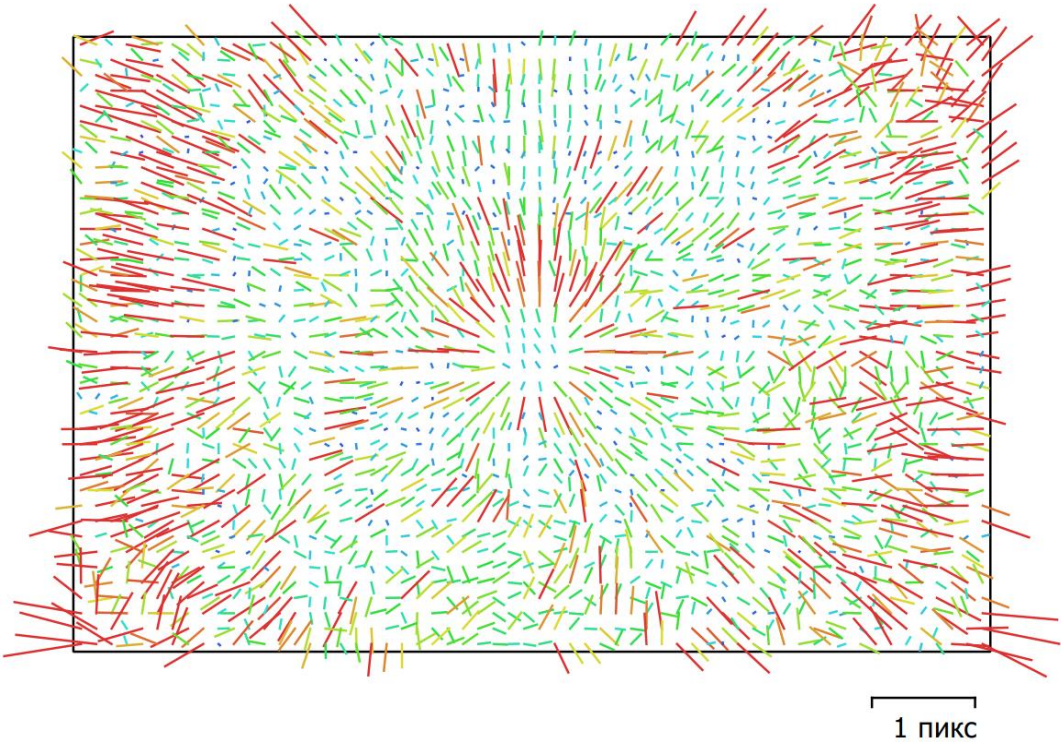

Calibration coefficients and correlation matrix.

Type Resolution Focal Length Pixel Size  
**Frame 5472 x 3648 8.8 mm 2.41 x 2.41  $\mu\text{m}$**

|    | Value       | Error   | F    | Cx    | Cy    | K1    | K2    | K3    | P1    | P2    |
|----|-------------|---------|------|-------|-------|-------|-------|-------|-------|-------|
| F  | 3718.56     | 0.14    | 1.00 | -0.24 | -0.96 | 0.01  | 0.02  | 0.05  | -0.11 | -0.18 |
| Cx | -19.9421    | 0.0072  |      | 1.00  | 0.25  | -0.07 | 0.01  | -0.03 | 0.86  | 0.15  |
| Cy | -53.6717    | 0.059   |      |       | 1.00  | -0.19 | 0.01  | -0.08 | 0.11  | 0.45  |
| K1 | -0.0101914  | 1e-05   |      |       |       | 1.00  | -0.80 | 0.74  | -0.06 | -0.62 |
| K2 | -0.00242888 | 2.4e-05 |      |       |       |       | 1.00  | -0.98 | 0.01  | 0.08  |
| K3 | 0.010321    | 2.2e-05 |      |       |       |       |       | 1.00  | -0.02 | -0.07 |
| P1 | -0.00161413 | 5.9e-07 |      |       |       |       |       |       | 1.00  | 0.09  |
| P2 | -0.00351766 | 2.1e-06 |      |       |       |       |       |       |       | 1.00  |

**3. Camera Locations:** Camera locations and error estimates. Z error is represented by ellipse color. X,Y errors are represented by ellipse shape. Estimated camera locations are marked with a black dot.

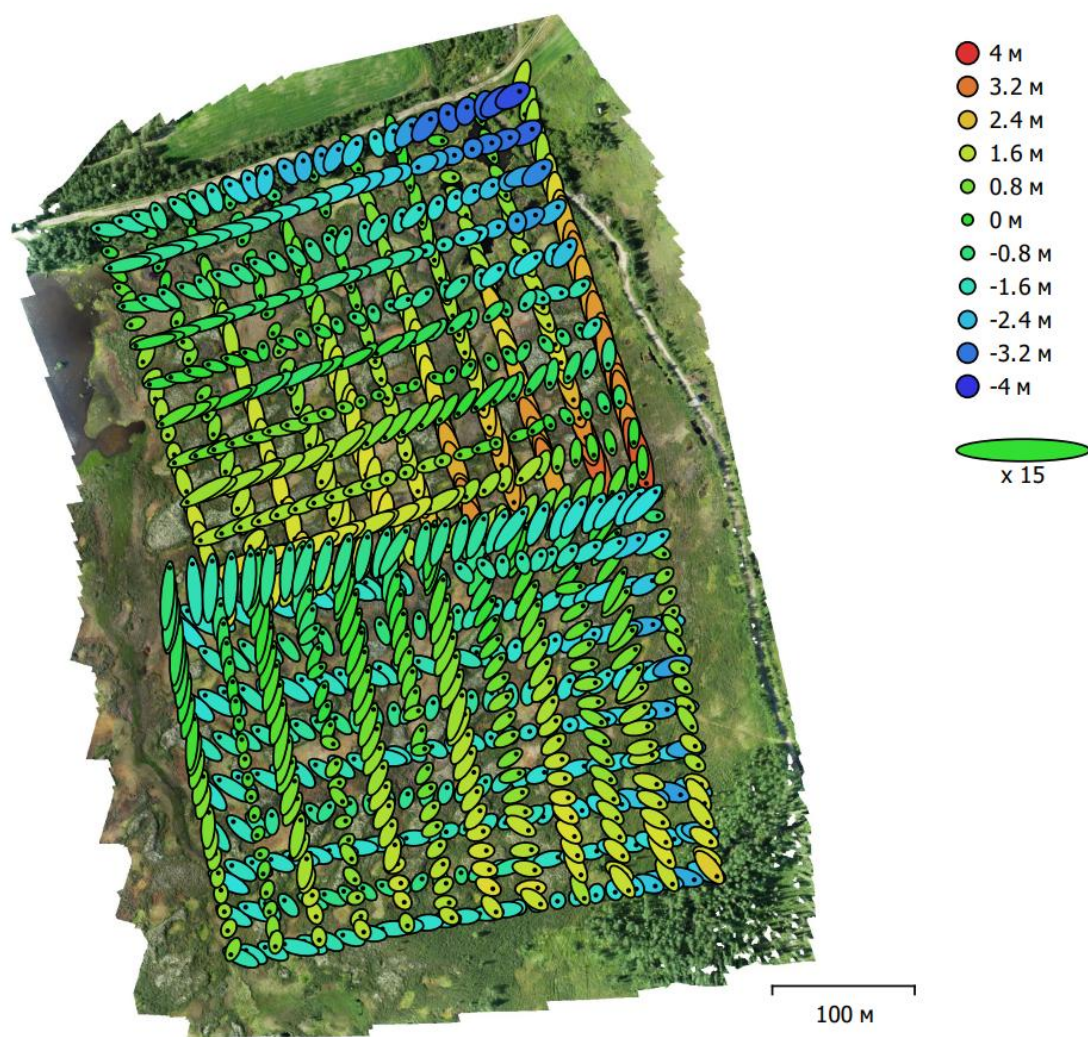

Supplement: s1 [file s1]
