# Supplementary material for: The Spatial Analysis of Vegetation Cover and Permafrost Degradation for a Subarctic Palsa Mire Based on UAS Photogrammetry and GPR Data in the Kola Peninsula
Source: MDPI journal article supplement (doi:10.3390/rs15071896), 2023-03-31
Supplement: s1 [file s1]

Table S1: Error matrix (pixel count)

| a                        | Normal Bayes Classifier |    |    |    |     |     |    |       |
|--------------------------|-------------------------|----|----|----|-----|-----|----|-------|
|                          | Actual classification   |    |    |    |     |     |    | Total |
| Predicted classification | Land cover              | LH | C  | TG | MH  | TSh | W  |       |
|                          | LH                      | 51 |    |    |     | 10  |    | 61    |
|                          | C                       | 3  | 54 | 1  | 10  | 1   |    | 69    |
|                          | TG                      |    | 1  | 74 |     | 18  |    | 93    |
|                          | MH                      | 1  | 5  |    | 84  | 3   |    | 93    |
|                          | TSh                     | 5  |    | 5  | 1   | 120 | 1  | 132   |
|                          | W                       |    |    |    | 5   |     | 29 | 34    |
| Total                    |                         | 60 | 60 | 80 | 100 | 152 | 30 | 482   |

  

| b                        | Random Forest         |    |    |    |     |     |    |       |
|--------------------------|-----------------------|----|----|----|-----|-----|----|-------|
|                          | Actual classification |    |    |    |     |     |    | Total |
| Predicted classification | Land cover            | LH | C  | TG | MH  | TSh | W  |       |
|                          | LH                    | 53 |    | 1  |     | 26  |    | 80    |
|                          | C                     |    | 55 | 8  | 12  | 1   |    | 76    |
|                          | TG                    |    | 3  | 64 | 3   | 19  |    | 89    |
|                          | MH                    | 2  | 2  | 3  | 80  | 7   | 6  | 100   |
|                          | TSh                   | 5  |    | 4  | 2   | 98  |    | 109   |
|                          | W                     |    |    |    | 3   | 1   | 24 | 28    |
| Total                    |                       | 60 | 60 | 80 | 100 | 152 | 30 | 482   |

  

|                          | Support Vector Machines |    |    |    |     |     |    |       |
|--------------------------|-------------------------|----|----|----|-----|-----|----|-------|
|                          | Actual classification   |    |    |    |     |     |    | Total |
| Predicted classification | Land cover              | LH | C  | TG | MH  | TSh | W  |       |
|                          | LH                      | 49 |    |    |     | 22  |    | 71    |
|                          | C                       | 2  | 54 | 1  | 16  |     |    | 73    |
|                          | TG                      |    |    | 69 |     | 9   |    | 78    |
|                          | MH                      | 1  | 6  | 1  | 78  | 6   |    | 92    |
|                          | TSh                     | 8  |    | 8  | 1   | 114 | 1  | 132   |
|                          | W                       |    |    | 1  | 5   | 1   | 29 | 36    |
| Total                    |                         | 60 | 60 | 80 | 100 | 152 | 30 | 482   |
